# Supplementary material for: Spin state of a single-molecule magnet (SMM) creating long-range ordering on ferromagnetic layers of a magnetic tunnel junction – a Monte Carlo study
Source: Royal Society of Chemistry journal article supplement (doi:10.1039/d1ra05473b), 2021-01-01
Supplement: d1ra05473b1.pdf [file d1ra05473b1.pdf]

## Supplementary Material

### **Spin State of Single Molecular Magnet (SMM) Creating Long Range Ordering on Ferromagnetic Layers of Magnetic Tunnel Junction -A Monte Carlo Study**

Andrew Grizzle, Christopher D'Angelo, Pawan Tyagi\*

Center for Nanotechnology Research and Education, Mechanical Engineering, University of the District of Columbia, Washington DC-20008, USA

Email of corresponding author: [ptyagi@udc.edu](mailto:ptyagi@udc.edu)

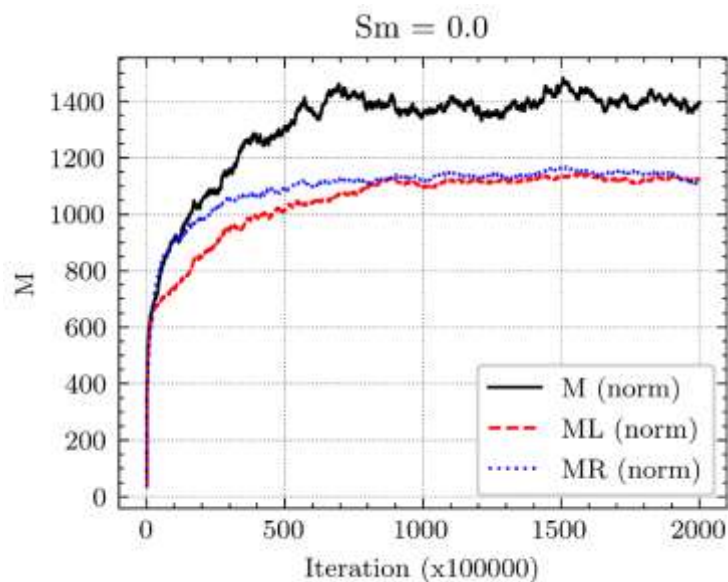

Fig. S1: M vs. time for  $S_m=0$ .

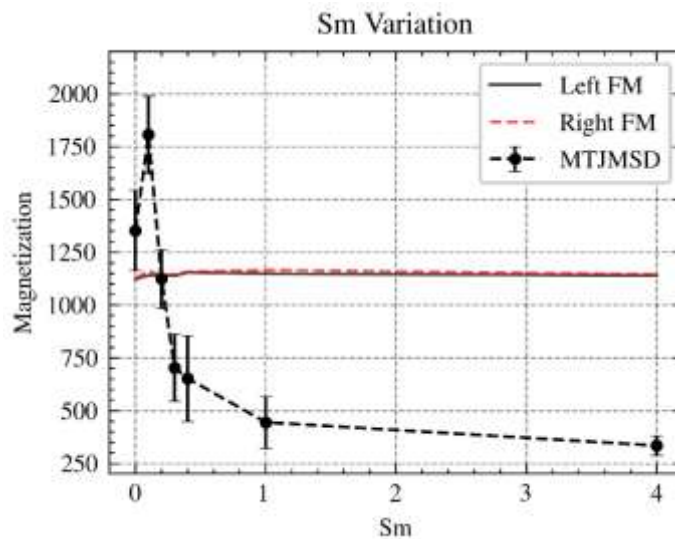

Fig.S2: Magnetization vs.  $S_m$  for 0-4  $S_m$  range

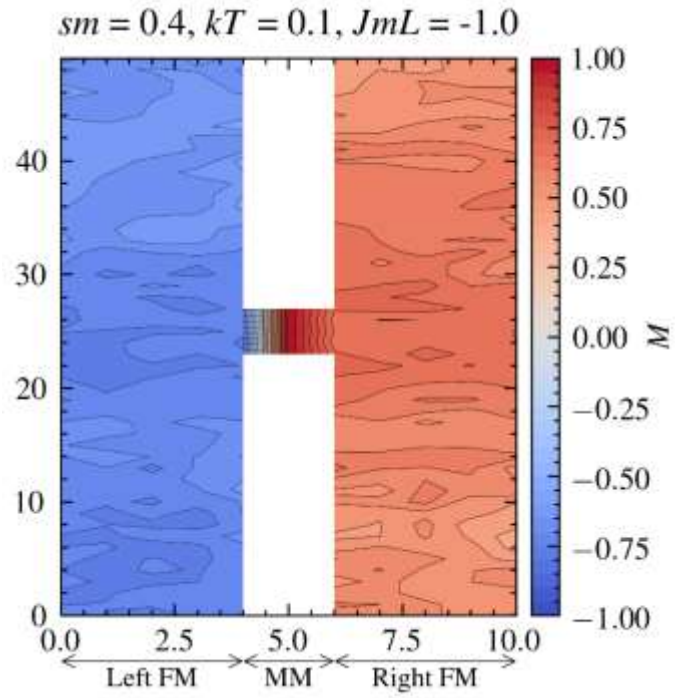

Fig. S3: Spatial correlation factor for  $Sm=0.4$

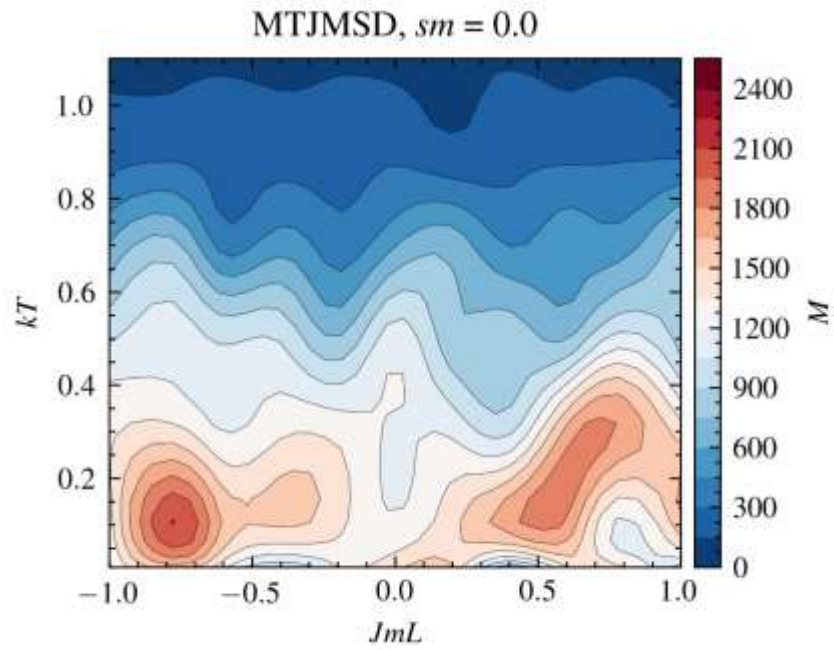

Fig. S4:  $kT$  vs  $JmL$  for  $Sm=0$ .  $JmR=|JmL|$ .
